# Supplementary material
Source: Springer Nature journal article supplement (https://www.springermedizin.de/resource/supplementary/12936_2012_2504_MOESM7_ESM.pdf/9543140)
Supplement: MOESM7 [file 9543140]

## BLOCKS

### Evidence on primaquine

- Pharmacology
  - » What's the active metabolite?
  - » Suitable drug partner?
- Safe and efficacious dose
- Safety by G6PD phenotype

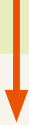

### Phase 1

Ex-vivo studies for efficacy and pharmacodynamics and pharmacokinetics

### Phase 2

Dose escalation for safety and efficacy in high risk groups

### Phase 3

Community trials with surrogate marker endpoints

### Phase 4

Determine safety in pregnancy through review of primaquine in pregnancy in countries using primaquine

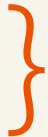

Common endpoints

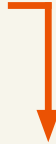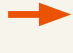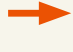

Unsafe in G6PD—need to develop PoC test for phenotype

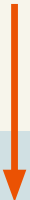

**Safe and efficacious dose for mass drug administration alone or in combination**

### Drug supply and regulation

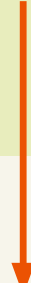

Identify stakeholders

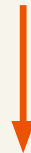

Inclusion of stakeholders in road map

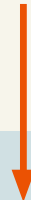

**Implemented**

### Alternatives

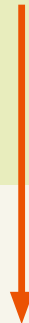

Development of gametocytocidal drugs, e.g., tafenoquine and methylene blue

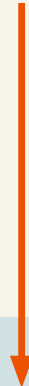

**Product pipeline moving**

## ROAD MAP

## GOAL
